# Supplementary material for: Hypoxia-augmented and photothermally-enhanced ferroptotic therapy with high specificity and efficiency
Source: Royal Society of Chemistry journal article supplement (doi:10.1039/c9tb02268f), 2019-11-13
Supplement: c9tb02268f1.pdf [file c9tb02268f1.pdf]

## Hypoxia-Augmented and Photothermal-Enhanced Ferroptotic Therapy with High Specificity and Efficiency

Peijing An<sup>a</sup>, Dihai Gu<sup>a</sup>, Zhiguo Gao<sup>a</sup>, Fengying Fan<sup>a</sup>, Yong Jiang<sup>a</sup>, Baiwang Sun<sup>a,\*</sup>

<sup>a</sup>: School of Chemistry and Chemical Engineering, Southeast University, Nanjing 210089, PR China

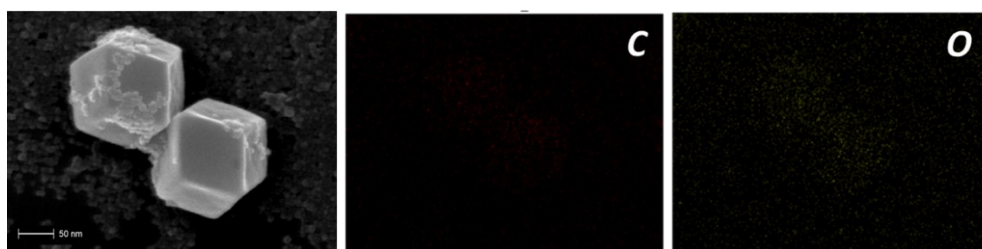

Figure S1. Corresponding elemental mapping of FGGZ.

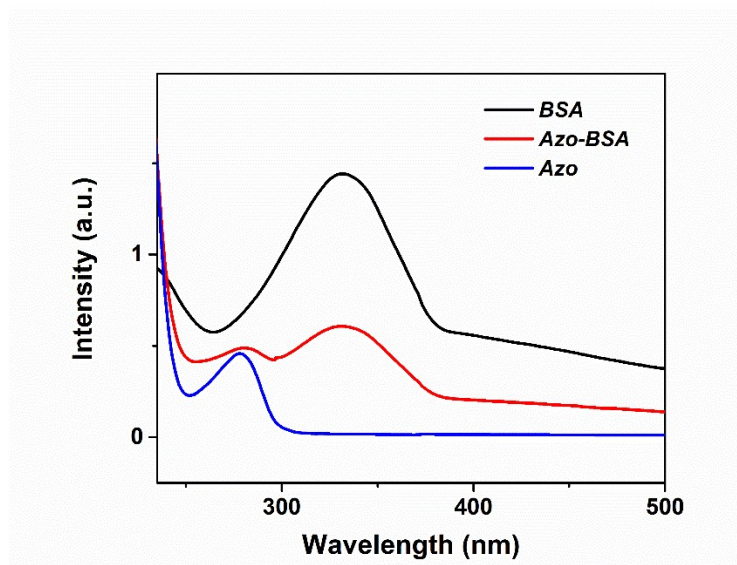

Figure S2. UV/Vis absorption spectra of Azo, BSA and Azo-BSA. Azo exhibited a characteristic absorption peak at 278 nm, and BSA exhibited a characteristic absorption peak at 332 nm. The obvious peaks at 278 nm and 332 nm of Azo-BSA spectrum proved the successful synthesis of Azo-BSA.

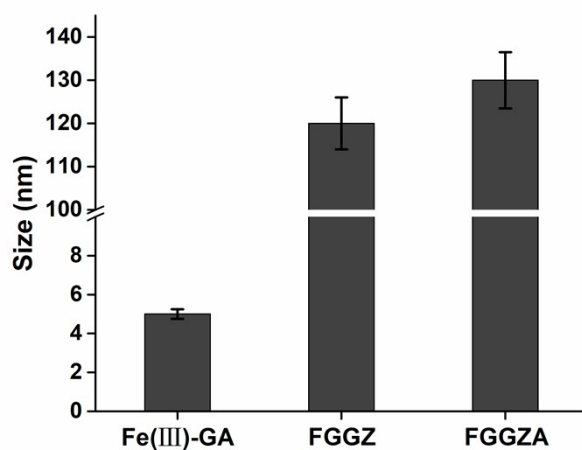

Figure S3. Particle size of Fe(III)-GA, FGGZ and FGGZA.

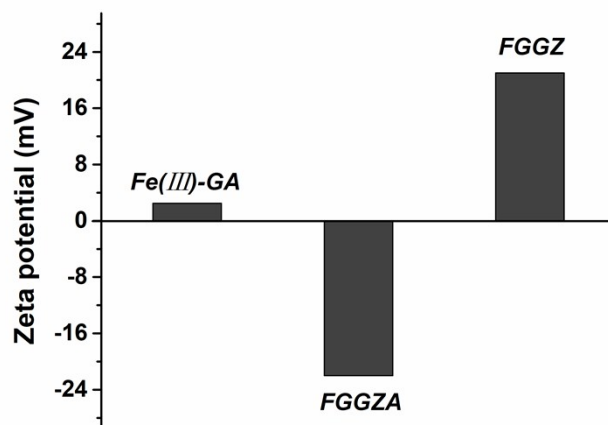

Figure S4. Zeta potential of Fe(III)-GA, FGGZ and FGGZA.

The photothermal conversion efficiency ( $\eta$ ) was given as:

$$\eta = \frac{hS(T_{\max} - T_{\text{surr}}) - Q_s}{I(1 - 10^{-A})}$$

$$hS = \frac{\sum m_i C_{p,i}}{\tau S}$$

$$t = \tau S(-\ln \theta)$$

$$\theta = \frac{T - T_{\text{surr}}}{T_{\max} - T_{\text{surr}}}$$

Where  $m$  is the mass of sample and equal to 1.0 g,  $c$  is the specific heat capacity of water (4.2 J g<sup>-1</sup>),  $T_{\max}$  is the maximum temperature and equal to 45.1 °C,  $T_{\text{surr}}$  is the temperature of ambient surroundings and equal to 26.1 °C. The  $Q_s$  expresses the heat associated with the light absorbance,  $I$  is the laser power density and equal to 1.0 W, and  $A$  is absorption of Fe(III)-GA aqueous solution at 808 nm and equal to 0.8588. The  $t$  is cooling time after irradiation. Finally, the photothermal conversion efficiency is calculated to be 66.5%.

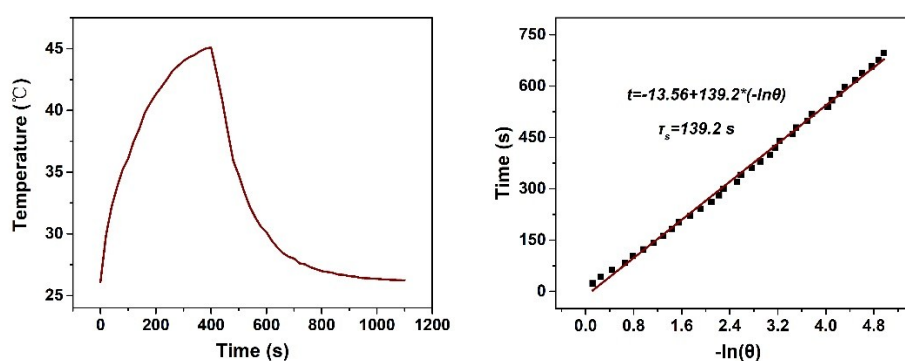

Figure S5. a) Heating and cooling curves of Fe(III)-GA aqueous solution (100  $\mu\text{g mL}^{-1}$ ) under irradiation of 808 nm laser (1 W  $\text{cm}^{-2}$ ). b) Linear time data versus  $-\ln\theta$  obtained from the cooling period.

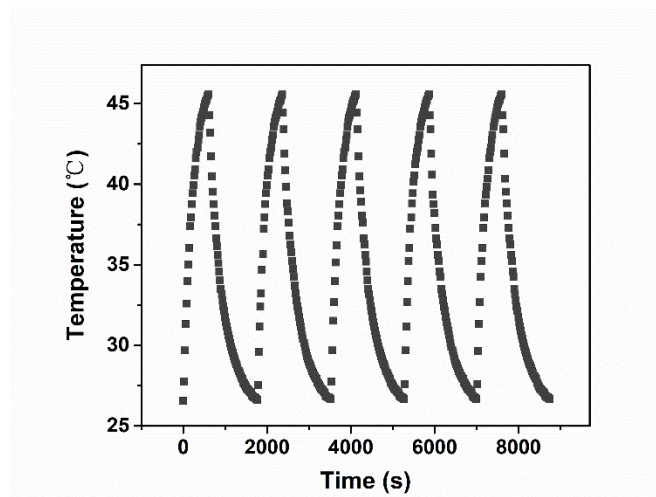

Figure S6. Temperature variations of Fe(III)-GA aqueous solution over five laser on/off cycles irradiated by 808 nm laser.

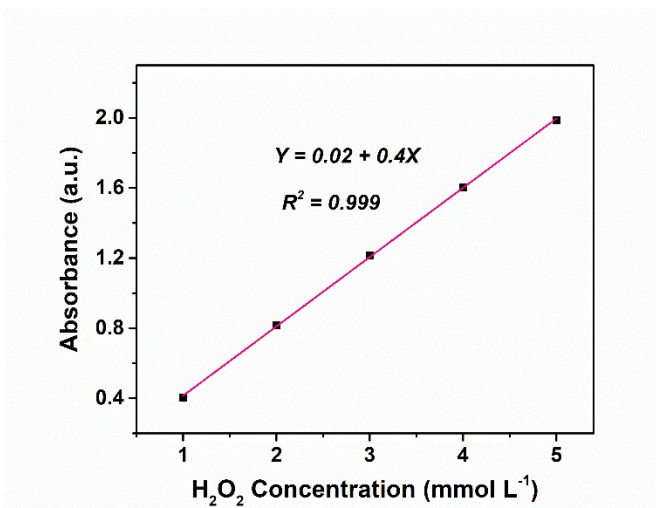

Figure S7. Standard calibration curve of H<sub>2</sub>O<sub>2</sub> aqueous solution.

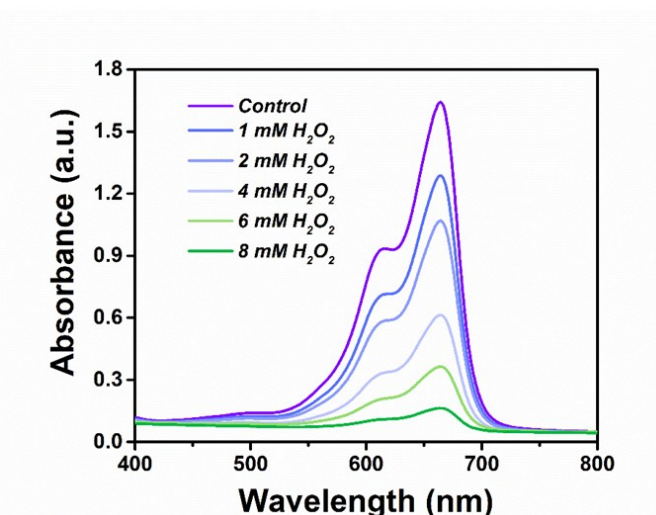

Figure S8. Degradation of MB with different concentration of H<sub>2</sub>O<sub>2</sub>. The degradation of MB significantly increased with the H<sub>2</sub>O<sub>2</sub> concentration increasing.

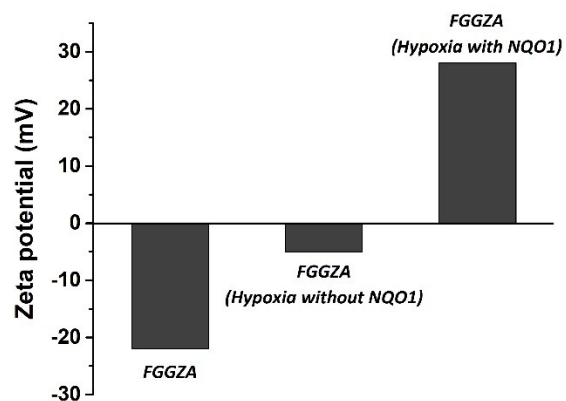

Figure S9. Zeta potential of FGGZA under various conditions.

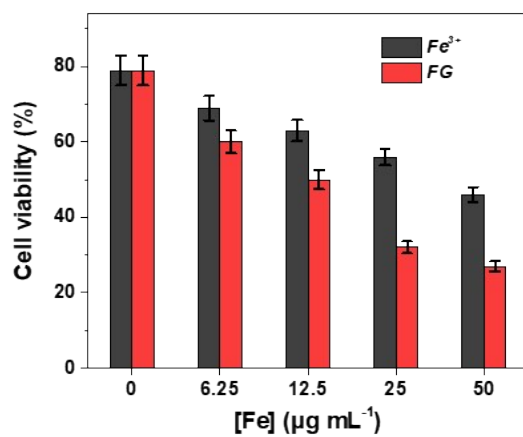

Figure S10. The cell viability of MCF-7 cells after 24 h of incubation of  $\text{Fe}^{3+}$  and  $\text{Fe(III)-GA}$ .

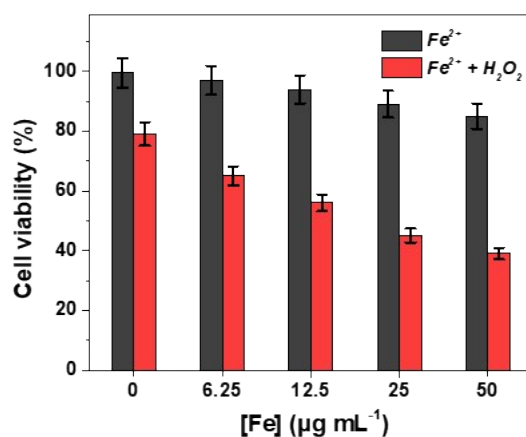

Figure S11. The cell viability of MCF-7 cells after 24 h of incubation of  $\text{Fe}^{2+}$  plus  $\text{H}_2\text{O}_2$  compared with  $\text{Fe}^{2+}$ .

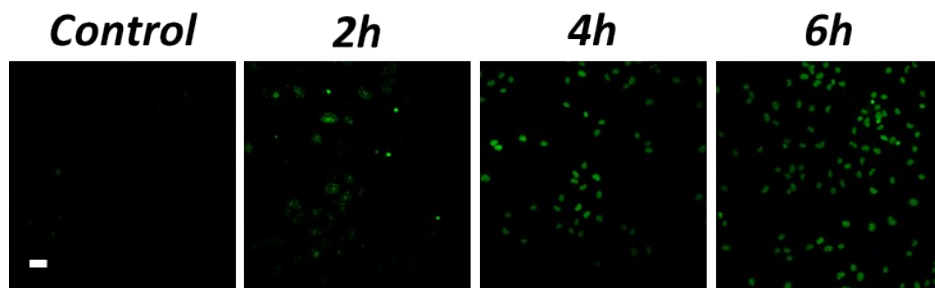

Figure S12. Qualitatively analysis of generated ROS in MCF-7 cells after incubation with  $\text{Fe}^{2+}$  measured by CLSM. (Scale bar, 40 nm)

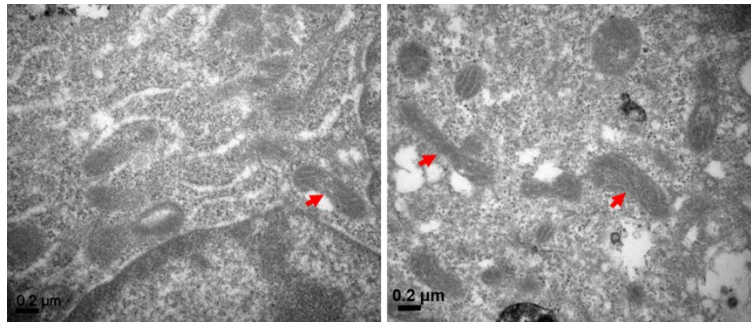

Figure S13. TEM image of MCF-7 cells treated with FGGZA plus NIR showing intact nucleus with complete structure and shrunken mitochondria with dense membrane.

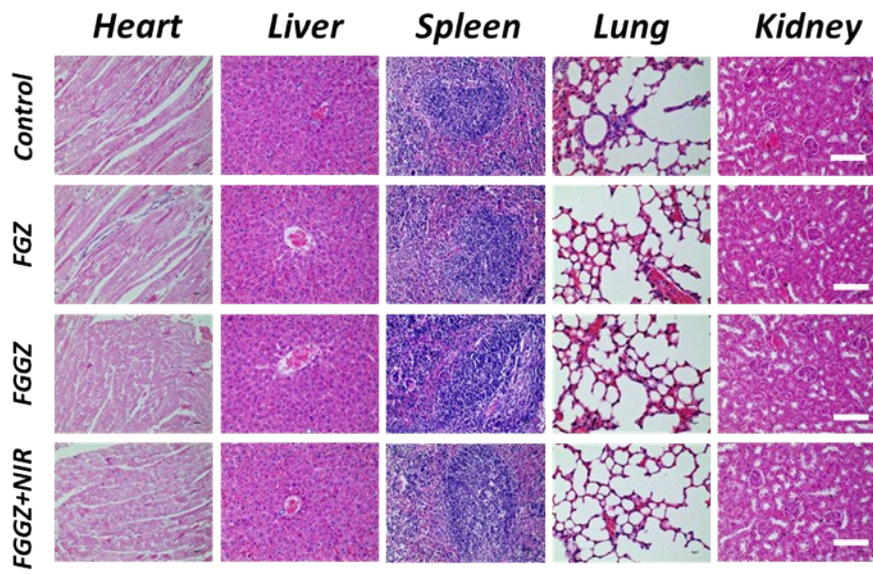

Figure S14. H&E stained images of major organ slices exposed to different groups. (bar = 100  $\mu\text{m}$ ).
